# Supplementary material for: Diffusive and Adiabatic Meridional Overturning Circulations in the Cooling Abyss of the Indo-Pacific Ocean
Source: Copernicus journal article supplement (doi:10.5194/egusphere-2025-989), 2025-03-10
Supplement: Supplementary file 1 [file egusphere-2025-989-supplement.pdf]

# **Diffusive and Adiabatic Meridional Overturning Circulations in the Cooling Abyss of the Indo-Pacific Ocean**

**Lei Han<sup>1</sup>**

<sup>1</sup> China-ASEAN College of Marine Sciences, Xiamen University Malaysia, Sepang,  
Malaysia

Corresponding author: Lei Han ([lei.han@xmu.edu.my](mailto:lei.han@xmu.edu.my))

## **Supplementary materials**

This document includes four figures:

Figure S1;

Figure S2;

Figure S3;

Figure S4;

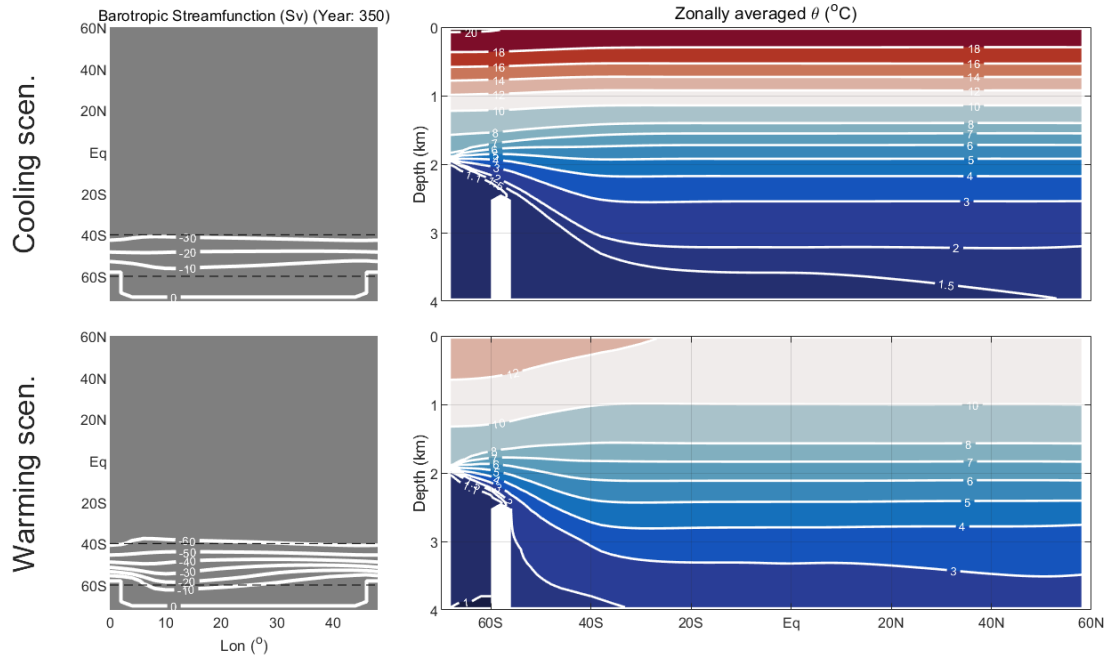

Figure S1. The same as Figure 10, but for year 350.

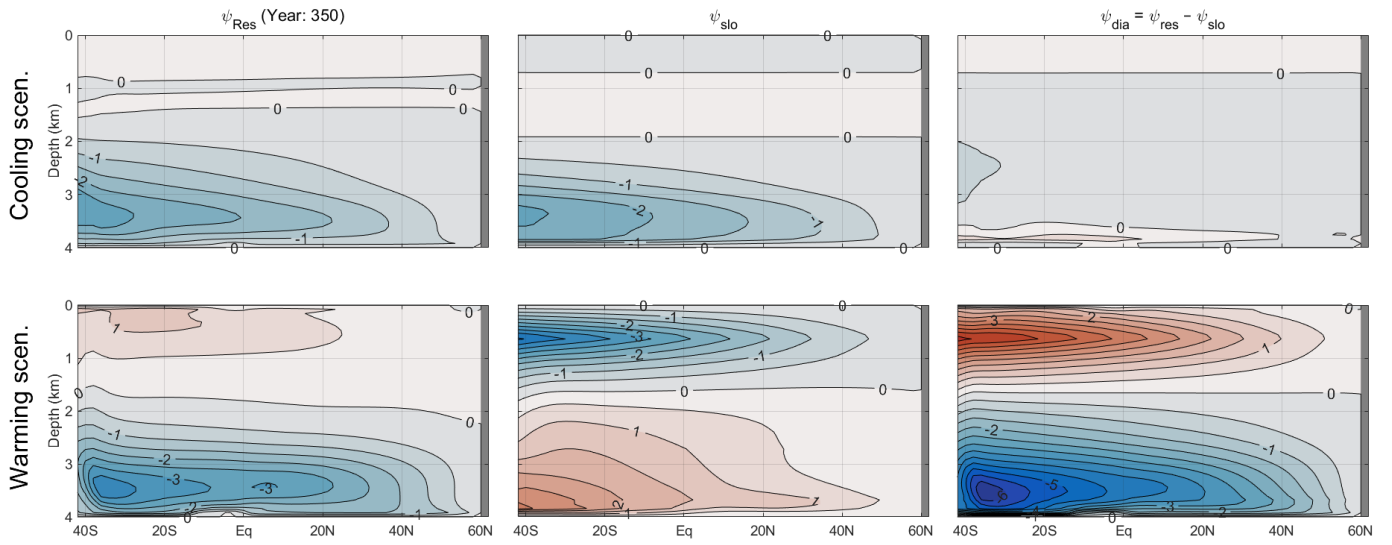

Figure S2. The same as Figure 11, but for year 350.

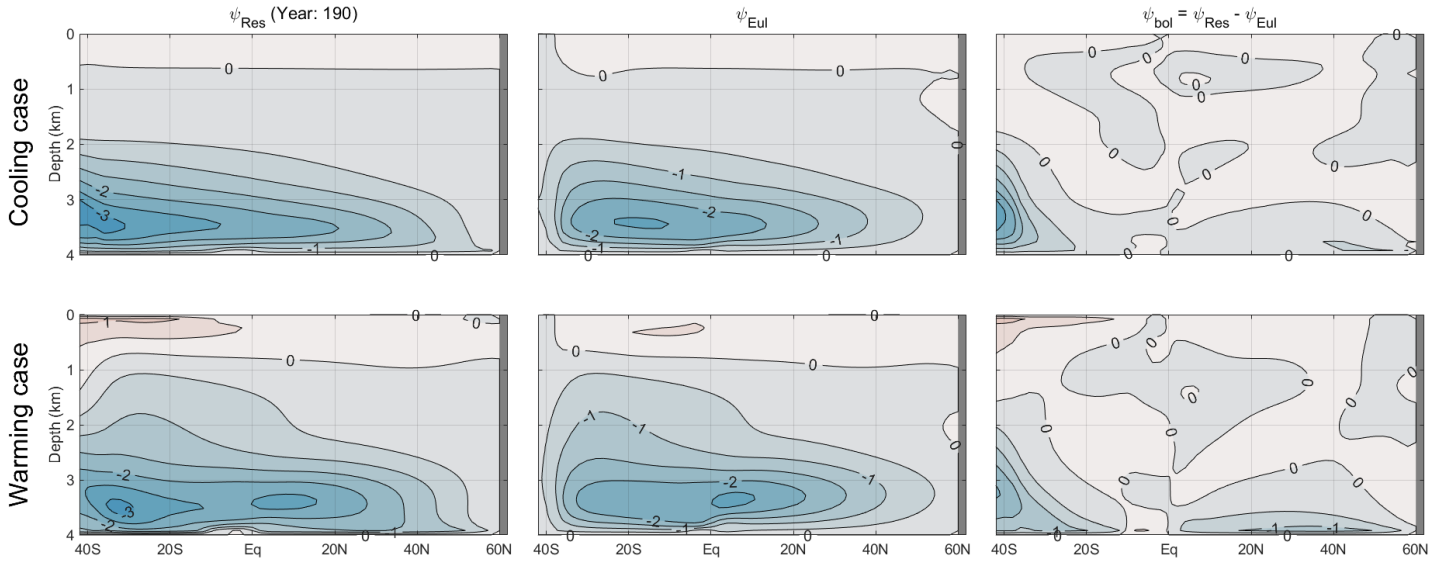

Figure S3. MOC streamfunctions for year 190: (left column) residual MOC streamfunction ( $\psi_{Res}$ ), (middle column) Eulerian MOC streamfunction ( $\psi_{Eul}$ ), and (right column) bolus MOC streamfunction ( $\psi_{bol} = \psi_{Res} - \psi_{Eul}$ ). The upper row corresponds to the cooling scenario, while the lower row represents the warming scenario. Negative values or cold colors represent anti-clockwise overturning cells. Unit: Sv. CI: 0.5 Sv.

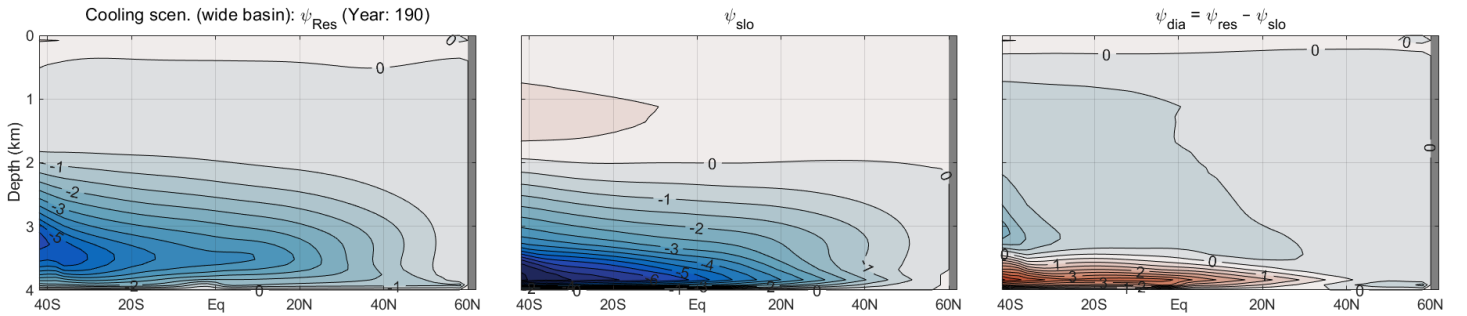

Figure S4. Same as the cooling experiment (upper row of Figure 11), but for a separate run with basin width that is twice as large.
